# Supplementary material for: Primary sclerosing cholangitis and the risk of cancer, cardiovascular disease, and all-cause mortality: a systematic review and meta-analysis of cohort studies
Source: PubMed Central journal article supplement (PMC8137938; doi:10.1038/s41598-021-90175-w), 2021-05-20
Supplement: 41598_2021_90175_MOESM1_ESM.pdf [file 41598_2021_90175_MOESM1_ESM.pdf]

Supplementary material for:

Dagfinn Aune, Abhijit Sen, Teresa Norat, Elio Riboli, Trine Folseraas. Primary sclerosing cholangitis and the risk of cancer, cardiovascular disease, and all-cause mortality: a systematic review and meta-analysis of cohort studies. Scientific Reports 2021 DOI: [10.1038/s41598-021-90175-w](https://doi.org/10.1038/s41598-021-90175-w)

Supplementary text: PubMed search strategy

- 1) "primary sclerosing cholangitis" OR "sclerosing cholangitis"
- 2) Oral OR pharyngeal OR pharynx OR oropharyngeal OR oropharynx OR hypopharyngeal OR hypopharynx OR nasal OR paranasal sinus OR Nasopharyngeal OR nasopharynx OR Laryngeal OR larynx OR Esophageal OR esophagus OR oesophageal OR oesophagus OR "Upper aerodigestive tract" OR "head and neck" OR Lung OR respiratory OR Stomach OR gastric OR "Small intestinal" OR "small intestine" OR "small bowel" OR Pancreatic OR pancreas OR Liver OR hepatocellular OR Gallbladder OR "Bile duct" OR Colon OR rectal OR rectum OR colorectal OR colorectum OR "large bowel" OR Breast OR mammary OR Ovarian OR ovary OR Endometrial OR endometrium OR "corpus uteri" OR uterine OR Cervical OR cervix OR Prostate OR Testicular OR testes OR penis OR penile OR Kidney OR renal OR "renal cell" OR adrenal OR Bladder OR urothelial OR "urinary tract" OR Brain OR Thyroid OR anal
- 3) Cancer OR carcinoma OR neoplasm OR tumor OR tumour
- 4) Cholangiocarcinoma OR lymphoma OR non-Hodgkin's lymphoma OR non-Hodgkin lymphoma OR Hodgkin's lymphoma OR Hodgkin lymphoma OR Hodgkin disease OR leukemia OR myeloma OR melanoma OR glioma OR meningioma OR sarcoma
- 5) "coronary heart disease" OR "heart disease" OR "ischemic heart disease" OR "ischaemic heart disease" OR "coronary artery disease" OR "myocardial infarction" OR "angina pectoris" OR "heart failure" OR "atrial fibrillation" OR "sudden cardiac death" OR "aortic aneurysm" OR "venous thromboembolism" OR "pulmonary embolism" OR stroke OR "ischemic stroke" OR "haemorrhagic stroke" OR "cerebrovascular disease" OR "cardiovascular disease" OR cancer OR "total cancer" OR neoplasm OR mortality OR "all-cause mortality" OR "total mortality" OR survival OR death
- 6) "case-control" OR cohort OR prospective OR longitudinal OR retrospective OR "follow-up" OR "cross-sectional" OR "hazard ratio" OR "hazard ratios" OR "relative risk" OR "relative risks" OR "incidence rate ratio" OR "incidence rate ratios" OR "odds ratio" OR odds ratios OR incidence
- 7) 2 AND 3
- 8) 3 OR 4 OR 5 OR 7
- 9) 1 AND 8 AND 6

## Embase search strategy

- 1) primary sclerosing cholangitis OR sclerosing cholangitis
- 2) primary sclerosing cholangitis/ OR sclerosing cholangitis/
- 3) Oral OR pharyngeal OR pharynx OR oropharyngeal OR oropharynx OR hypopharyngeal OR hypopharynx OR nasal OR paranasal sinus OR Nasopharyngeal OR nasopharynx OR Laryngeal OR larynx OR Esophageal OR esophagus OR oesophageal OR oesophagus OR Upper aerodigestive tract OR head and neck OR Lung OR respiratory OR Stomach OR gastric OR Small intestinal OR small intestine OR small bowel OR Pancreatic OR pancreas OR Liver OR hepatocellular OR Gallbladder OR Bile duct OR Colon OR rectal OR rectum OR colorectal OR colorectum OR large bowel OR Breast OR mammary OR Ovarian OR ovary OR Endometrial OR endometrium OR corpus uteri OR uterine OR Cervical OR cervix OR Prostate OR Testicular OR testes OR penis OR penile OR Kidney OR renal OR renal cell OR adrenal OR Bladder OR urothelial OR urinary tract OR Brain OR Thyroid OR anal
- 4) Oral/ OR pharyngeal/ OR pharynx/ OR oropharyngeal/ OR oropharynx/ OR hypopharyngeal/ OR hypopharynx/ OR nasal/ OR paranasal sinus/ OR Nasopharyngeal/ OR nasopharynx/ OR Laryngeal/ OR larynx/ OR Esophageal/ OR esophagus/ OR oesophageal/ OR oesophagus/ OR Upper aerodigestive tract/ OR Lung/ OR respiratory/ OR Stomach/ OR gastric/ OR Small intestinal/ OR small intestine/ OR small bowel/ OR Pancreatic/ OR pancreas/ OR Liver/ OR hepatocellular/ OR Gallbladder/ OR Bile duct/ OR Colon/ OR rectal/ OR rectum/ OR colorectal/ OR colorectum/ OR large bowel/ OR Breast/ OR mammary/ OR Ovarian/ OR ovary/ OR Endometrial/ OR endometrium/ OR corpus uteri/ OR uterine/ OR Cervical/ OR cervix/ OR Prostate/ OR Testicular/ OR testes/ OR penis/ OR penile/ OR Kidney/ OR renal/ OR renal cell/ OR adrenal/ OR Bladder/ OR urothelial/ OR urinary tract/ OR Brain/ OR Thyroid/ OR anal/
- 5) Cancer OR carcinoma OR neoplasm OR tumor OR tumour
- 6) Cancer/ OR carcinoma/ OR neoplasm/ OR tumor/ OR tumour/
- 7) Cholangiocarcinoma OR lymphoma OR non-Hodgkins lymphoma OR non-Hodgkin lymphoma OR Hodgkins lymphoma OR Hodgkin lymphoma OR Hodgkin disease OR leukemia OR myeloma OR melanoma OR glioma OR meningioma OR sarcoma
- 8) Cholangiocarcinoma/ OR lymphoma/ OR non-Hodgkins lymphoma/ OR non-Hodgkin lymphoma/ OR Hodgkins lymphoma/ OR Hodgkin lymphoma/ OR Hodgkin disease/ OR leukemia/ OR myeloma/ OR melanoma/ OR glioma/ OR meningioma/ OR sarcoma/
- 9) coronary heart disease OR heart disease OR ischemic heart disease OR ischaemic heart disease OR coronary artery disease OR myocardial infarction OR angina

pectoris OR heart failure OR atrial fibrillation OR sudden cardiac death OR aortic aneurysm OR venous thromboembolism OR pulmonary embolism OR stroke OR ischemic stroke OR haemorrhagic stroke OR cerebrovascular disease OR cardiovascular disease OR cancer OR total cancer OR neoplasm OR mortality OR all-cause mortality OR total mortality OR survival OR death

- 10) coronary heart disease/ OR heart disease/ OR ischemic heart disease/ OR ischaemic heart disease/ OR coronary artery disease/ OR myocardial infarction/ OR angina pectoris/ OR heart failure/ OR atrial fibrillation/ OR sudden cardiac death/ OR aortic aneurysm/ OR venous thromboembolism/ OR pulmonary embolism/ OR stroke/ OR ischemic stroke/ OR haemorrhagic stroke/ OR cerebrovascular disease/ OR cardiovascular disease/ OR cancer/ OR total cancer/ OR neoplasm/ OR mortality/ OR all-cause mortality/ OR total mortality/ OR survival/ OR death/
- 11) case-control OR cohort OR prospective OR longitudinal OR retrospective OR follow-up OR cross-sectional OR hazard ratio OR hazard ratios OR relative risk OR relative risks OR incidence rate ratio OR incidence rate ratios OR odds ratio OR odds ratios OR incidence
- 12) 1 OR 2
- 13) 3 OR 4
- 14) 5 OR 6
- 15) 13 AND 14
- 16) 7 OR 8 OR 9 OR 10 OR 14 OR 15
- 17) 12 AND 16 AND 11

Supplementary Table 1. List of excluded studies and exclusion reasons

| Exclusion reason                                | Reference number |
|-------------------------------------------------|------------------|
| Abstract                                        | (1-4)            |
| Case-control study                              | (5-13)           |
| Comment                                         | (14-17)          |
| Editorial                                       | (18)             |
| Meta-analysis (IBD and PSC combined)            | (19-22)          |
| No risk estimates                               | (23-71)          |
| Not relevant data                               | (72)             |
| Not relevant exposure                           | (73-79)          |
| Not relevant outcome                            | (80;81)          |
| Patient controls                                | (82-84)          |
| Patient populations                             | (85-112)         |
| PSC patients only (no control/comparison group) | (113-132)        |
| Review                                          | (133-210)        |

#### Reference List

1. Barner-Rasmussen N, Farkkila MA. Survival of primary sclerosing cholangitis: A population-based study in Finland. United European Gastroenterology Journal Conference: 26th United European Gastroenterology Week, UEG 2018;October.
2. Simionato F, Cazzagon N, Llovet LP et al. Hepatobiliary and non-hepatobiliary malignancies in psc patients from Southern Europe: A comparative study in two European centers. Hepatology Conference: 69th Annual Meeting of the American Association for the Study of Liver Diseases, AASLD 2018;October.
3. Carbone M, Kodra Y, Rocchetti A et al. Incidence, prevalence and mortality of primary sclerosing cholangitis in Italy: A population-based study. Journal of Hepatology Conference: The International Liver Congress 2019;April.
4. Wu K, Connell W, Bell S et al. Clinical outcomes and management of patients with concomitant primary sclerosing cholangitis and inflammatory bowel disease. Journal of Gastroenterology and Hepatology Conference: Gastroenterological Society of Australia,

GESA and Australian Gastroenterology Week, AGW "Gut Matters" Australia 33 (Supplement 2) (pp 114), 2018;September.

5. Bansal P, Sonnenberg A. Risk factors of colorectal cancer in inflammatory bowel disease. *Am J Gastroenterol* 1996;91:44-8.
6. Bergquist A, Glaumann H, Persson B, Broome U. Risk factors and clinical presentation of hepatobiliary carcinoma in patients with primary sclerosing cholangitis: a case-control study. *Hepatology* 1998;27:311-6.
7. Leidenius M, Hockersted K, Broome U et al. Hepatobiliary carcinoma in primary sclerosing cholangitis: a case control study. *J Hepatol* 2001;34:792-8.
8. Bjornsson E, Angulo P. Cholangiocarcinoma in young individuals with and without primary sclerosing cholangitis. *Am J Gastroenterol* 2007;102:1677-82.
9. Zhou Z, Nie S-D, Jiang B, Wang J, Lv P. Risk factors for extrahepatic cholangiocarcinoma: A case-control study in China. *European Journal of Cancer Prevention* 2019;28:254-7.
10. McGee EE, Castro FA, Engels EA et al. Associations between autoimmune conditions and hepatobiliary cancer risk among elderly US adults. *International Journal of Cancer* 2019;144:707-17.
11. Rutter M, Saunders B, Wilkinson K et al. Severity of inflammation is a risk factor for colorectal neoplasia in ulcerative colitis. *Gastroenterology* 2004;126:451-9.
12. Velayos FS, Loftus EV, Jr., Jess T et al. Predictive and protective factors associated with colorectal cancer in ulcerative colitis: A case-control study. *Gastroenterology* 2006;130:1941-9.
13. Biewenga M, Van Den BA, Van BH, van HB. Characteristics and outcome of autoimmune hepatitis-primary biliary cholangitis and autoimmune hepatitis-primary sclerosing cholangitis overlap patients compared to autoimmune hepatitis patients. *Journal of Hepatology Conference: The International Liver Congress 2019;April*.
14. Helper DJ. PSC in UC: is it or is it not a risk factor for the development of neoplasia? *Inflamm Bowel Dis* 2000;6:61-2.
15. Stiehl A. Primary sclerosing cholangitis: neoplastic potential in bile ducts, colon and the pancreas? *J Hepatol* 2002;36:433-4.
16. Kingham JG, Kochar N, Gravenor MB. Incidence, clinical patterns, and outcomes of primary sclerosing cholangitis in South Wales, United Kingdom. *Gastroenterology* 2004;126:1929-30.
17. Shariff MI, Maggs J, Heneghan MA. Mortality and the risk of malignancy in autoimmune liver diseases: a population-based study in Canterbury, New Zealand. *Hepatology* 2013;57:1677.
18. Sokol H, Chazouilleres O. Colorectal neoplasia in PSC-IBD patients: are times changing? *Liver Int* 2012;32:175-6.
19. Soetikno RM, Lin OS, Heidenreich PA, Young HS, Blackstone MO. Increased risk of colorectal neoplasia in patients with primary sclerosing cholangitis and ulcerative colitis: a meta-analysis. *Gastrointest Endosc* 2002;56:48-54.

20. Singh S, Edakkanambeth VJ, Loftus EV, Jr., Talwalkar JA. Incidence of colorectal cancer after liver transplantation for primary sclerosing cholangitis: a systematic review and meta-analysis. *Liver Transpl* 2013;19:1361-9.
21. Zheng HH, Jiang XL. Increased risk of colorectal neoplasia in patients with primary sclerosing cholangitis and inflammatory bowel disease: a meta-analysis of 16 observational studies. *Eur J Gastroenterol Hepatol* 2016;28:383-90.
22. Komaki Y, Komaki F, Micic D, Ido A, Sakuraba A. Risk of colorectal cancer in chronic liver diseases: a systematic review and meta-analysis. *Gastrointest Endosc* 2017;86:93-104.
23. Wiesner RH, Grambsch PM, Dickson ER et al. Primary sclerosing cholangitis: natural history, prognostic factors and survival analysis. *Hepatology* 1989;10:430-6.
24. Higashi H, Yanaga K, Marsh JW, Tzakis A, Kakizoe S, Starzl TE. Development of colon cancer after liver transplantation for primary sclerosing cholangitis associated with ulcerative colitis. *Hepatology* 1990;11:477-80.
25. Ismail T, Angrisani L, Powell JE et al. Primary sclerosing cholangitis: surgical options, prognostic variables and outcome. *Br J Surg* 1991;78:564-7.
26. Wiesner RH, Porayko MK, Dickson ER et al. Selection and timing of liver transplantation in primary biliary cirrhosis and primary sclerosing cholangitis. *Hepatology* 1992;16:1290-9.
27. Abu-Elmagd KM, Malinchoc M, Dickson ER et al. Efficacy of hepatic transplantation in patients with primary sclerosing cholangitis. *Surg Gynecol Obstet* 1993;177:335-44.
28. Abu-Elmagd KM, Selby R, Iwatsuki S et al. Cholangiocarcinoma and sclerosing cholangitis: clinical characteristics and effect on survival after liver transplantation. *Transplant Proc* 1993;25:1124-5.
29. Gurbuz AK, Giardiello FM, Bayless TM. Colorectal neoplasia in patients with ulcerative colitis and primary sclerosing cholangitis. *Dis Colon Rectum* 1995;38:37-41.
30. Nashan B, Schlitt HJ, Tusch G et al. Biliary malignancies in primary sclerosing cholangitis: timing for liver transplantation. *Hepatology* 1996;23:1105-11.
31. Broome U, Olsson R, Loof L et al. Natural history and prognostic factors in 305 Swedish patients with primary sclerosing cholangitis. *Gut* 1996;38:610-5.
32. Kornfeld D, Ekbom A, Ihre T. Survival and risk of cholangiocarcinoma in patients with primary sclerosing cholangitis. A population-based study. *Scand J Gastroenterol* 1997;32:1042-5.
33. Harnois DM, Gores GJ, Ludwig J, Steers JL, LaRusso NF, Wiesner RH. Are patients with cirrhotic stage primary sclerosing cholangitis at risk for the development of hepatocellular cancer? *J Hepatol* 1997;27:512-6.
34. Leidenius MH, Farkkila MA, Karkkainen P, Taskinen EI, Kellokumpu IH, Hockerstedt KA. Colorectal dysplasia and carcinoma in patients with ulcerative colitis and primary sclerosing cholangitis. *Scand J Gastroenterol* 1997;32:706-11.
35. Mendes FD, Kim WR, Pedersen R, Therneau T, Lindor KD. Mortality attributable to cholestatic liver disease in the United States. *Hepatology* 2008;47:1241-7.

36. Claessen MM, Vleggaar FP, Tytgat KM, Siersema PD, van Buuren HR. High lifetime risk of cancer in primary sclerosing cholangitis. *J Hepatol* 2009;50:158-64.
37. Rudolph G, Gotthardt D, Kloeters-Plachky P, Rost D, Kulaksiz H, Stiehl A. In PSC with dominant bile duct stenosis, IBD is associated with an increase of carcinomas and reduced survival. *J Hepatol* 2010;53:313-7.
38. Toy E, Balasubramanian S, Selmi C, Li CS, Bowlus CL. The prevalence, incidence and natural history of primary sclerosing cholangitis in an ethnically diverse population. *BMC Gastroenterol* 2011;11:83.
39. Dickson ER, Murtaugh PA, Wiesner RH et al. Primary sclerosing cholangitis: refinement and validation of survival models. *Gastroenterology* 1992;103:1893-901.
40. Olsson RG, Asztely MS. Prognostic value of cholangiography in primary sclerosing cholangitis. *Eur J Gastroenterol Hepatol* 1995;7:251-4.
41. Ponsioen CY, Vrouenraets SM, Prawirodirdjo W et al. Natural history of primary sclerosing cholangitis and prognostic value of cholangiography in a Dutch population. *Gut* 2002;51:562-6.
42. Buckles DC, Lindor KD, LaRusso NF, Petrovic LM, Gores GJ. In primary sclerosing cholangitis, gallbladder polyps are frequently malignant. *Am J Gastroenterol* 2002;97:1138-42.
43. Broome U, Glaumann H, Lindstom E et al. Natural history and outcome in 32 Swedish patients with small duct primary sclerosing cholangitis (PSC). *J Hepatol* 2002;36:586-9.
44. Feldstein AE, Perrault J, El-Youssif M, Lindor KD, Freese DK, Angulo P. Primary sclerosing cholangitis in children: a long-term follow-up study. *Hepatology* 2003;38:210-7.
45. Tischendorf JJ, Hecker H, Kruger M, Manns MP, Meier PN. Characterization, outcome, and prognosis in 273 patients with primary sclerosing cholangitis: A single center study. *Am J Gastroenterol* 2007;102:107-14.
46. Bjornsson E, Olsson R, Bergquist A et al. The natural history of small-duct primary sclerosing cholangitis. *Gastroenterology* 2008;134:975-80.
47. Said K, Glaumann H, Bergquist A. Gallbladder disease in patients with primary sclerosing cholangitis. *J Hepatol* 2008;48:598-605.
48. Kornasiewicz O, Lewandowski Z, Dudek K, Stankiewicz R, Nyckowski P, Krawczyk M. Prediction of graft loss and death in patients with primary sclerosing cholangitis. *Transplant Proc* 2009;41:3110-3.
49. Ataseven H, Parlak E, Yuksel I et al. Primary sclerosing cholangitis in Turkish patients: characteristic features and prognosis. *Hepatobiliary Pancreat Dis Int* 2009;8:312-5.
50. Kashyap R, Mantry P, Sharma R et al. Comparative analysis of outcomes in living and deceased donor liver transplants for primary sclerosing cholangitis. *J Gastrointest Surg* 2009;13:1480-6.
51. Garioud A, Seksik P, Chretien Y et al. Characteristics and clinical course of primary sclerosing cholangitis in France: a prospective cohort study. *Eur J Gastroenterol Hepatol* 2010;22:842-7.



52. Ngu JH, Gearry RB, Wright AJ, Stedman CA. Inflammatory bowel disease is associated with poor outcomes of patients with primary sclerosing cholangitis. *Clin Gastroenterol Hepatol* 2011;9:1092-7.
53. Lamberts LE, Janse M, Haagsma EB, van den Berg AP, Weersma RK. Immune-mediated diseases in primary sclerosing cholangitis. *Dig Liver Dis* 2011;43:802-6.
54. Sinakos E, Saenger AK, Keach J, Kim WR, Lindor KD. Many patients with primary sclerosing cholangitis and increased serum levels of carbohydrate antigen 19-9 do not have cholangiocarcinoma. *Clin Gastroenterol Hepatol* 2011;9:434-9.
55. Chapman MH, Webster GJ, Bannoo S, Johnson GJ, Wittmann J, Pereira SP. Cholangiocarcinoma and dominant strictures in patients with primary sclerosing cholangitis: a 25-year single-centre experience. *Eur J Gastroenterol Hepatol* 2012;24:1051-8.
56. Hirano K, Tada M, Mizuno S et al. Lower incidence of biliary carcinoma in patients with primary sclerosing cholangitis and high serum levels of immunoglobulin E. *Clin Gastroenterol Hepatol* 2012;10:79-83.
57. Fevery J, Henckaerts L, Van OR et al. Malignancies and mortality in 200 patients with primary sclerosing cholangitis: a long-term single-centre study. *Liver Int* 2012;32:214-22.
58. Rupp C, Mummelthel A, Sauer P et al. Non-IBD immunological diseases are a risk factor for reduced survival in PSC. *Liver Int* 2013;33:86-93.
59. Geramizadeh B, Ghavvas R, Kazemi K, Shamsaeefar A, Nikeghbalian S, Malekhosseini SA. Cholangiocarcinoma Secondary to Primary Sclerosing Cholangitis in Explanted Livers: A Single-Center Study in the South of Iran. *Hepat Mon* 2015;15:e33626.
60. Eaton JE, Barr Fritcher EG, Gores GJ et al. Biliary multifocal chromosomal polysomy and cholangiocarcinoma in primary sclerosing cholangitis. *Am J Gastroenterol* 2015;110:299-309.
61. Yanai H, Matalon S, Rosenblatt A et al. Prognosis of primary sclerosing cholangitis in israel is independent of coexisting inflammatory bowel Disease. *J Crohns Colitis* 2015;9:177-84.
62. Gulamhusein AF, Eaton JE, Tabibian JH, Atkinson EJ, Juran BD, Lazaridis KN. Duration of Inflammatory Bowel Disease Is Associated With Increased Risk of Cholangiocarcinoma in Patients With Primary Sclerosing Cholangitis and IBD. *Am J Gastroenterol* 2016;111:705-11.
63. Hilscher M, Enders FB, Carey EJ, Lindor KD, Tabibian JH. Alkaline phosphatase normalization is a biomarker of improved survival in primary sclerosing cholangitis. *Ann Hepatol* 2016;15:246-53.
64. Liu K, Wang R, Kariyawasam V et al. Epidemiology and outcomes of primary sclerosing cholangitis with and without inflammatory bowel disease in an Australian cohort. *Liver Int* 2017;37:442-8.
65. Post AB, Bozdech JM, Lavery I, Barnes DS. Colectomy in patients with inflammatory bowel disease and primary sclerosing cholangitis. *Dis Colon Rectum* 1994;37:175-8.
66. Siqueira E, Schoen RE, Silverman W et al. Detecting cholangiocarcinoma in patients with primary sclerosing cholangitis. *Gastrointest Endosc* 2002;56:40-7.
67. Boberg KM, Rocca G, Egeland T et al. Time-dependent Cox regression model is superior in prediction of prognosis in primary sclerosing cholangitis. *Hepatology* 2002;35:652-7.

68. Rudolph G, Kloeters-Plachky P, Rost D, Stiehl A. The incidence of cholangiocarcinoma in primary sclerosing cholangitis after long-time treatment with ursodeoxycholic acid. *Eur J Gastroenterol Hepatol* 2007;19:487-91.
69. Ang TL, Fock KM, Ng TM, Teo EK, Chua TS, Tan JY. Clinical profile of primary sclerosing cholangitis in Singapore. *J Gastroenterol Hepatol* 2002;17:908-13.
70. Johnson GK, Saeian K, Geenen JE. Primary sclerosing cholangitis treated by endoscopic biliary dilation: review and long-term follow-up evaluation. *Curr Gastroenterol Rep* 2006;8:147-55.
71. Morris-Stiff G, Bhati C, Olliff S et al. Cholangiocarcinoma complicating primary sclerosing cholangitis: a 24-year experience. *Dig Surg* 2008;25:126-32.
72. Kaya M, de Groen PC, Angulo P et al. Treatment of cholangiocarcinoma complicating primary sclerosing cholangitis: the Mayo Clinic experience. *Am J Gastroenterol* 2001;96:1164-9.
73. Chalasani N, Baluyut A, Ismail A et al. Cholangiocarcinoma in patients with primary sclerosing cholangitis: a multicenter case-control study. *Hepatology* 2000;31:7-11.
74. Pardi DS, Loftus EV, Jr., Kremers WK, Keach J, Lindor KD. Ursodeoxycholic acid as a chemopreventive agent in patients with ulcerative colitis and primary sclerosing cholangitis. *Gastroenterology* 2003;124:889-93.
75. Olsson R, Boberg KM, de Muckadell OS et al. High-dose ursodeoxycholic acid in primary sclerosing cholangitis: a 5-year multicenter, randomized, controlled study. *Gastroenterology* 2005;129:1464-72.
76. Wolf JM, Rybicki LA, Lashner BA. The impact of ursodeoxycholic acid on cancer, dysplasia and mortality in ulcerative colitis patients with primary sclerosing cholangitis. *Aliment Pharmacol Ther* 2005;22:783-8.
77. Zhou YM, Yin ZF, Yang JM et al. Risk factors for intrahepatic cholangiocarcinoma: a case-control study in China. *World J Gastroenterol* 2008;14:632-5.
78. Melum E, Karlsen TH, Schrumpf E et al. Cholangiocarcinoma in primary sclerosing cholangitis is associated with NKG2D polymorphisms. *Hepatology* 2008;47:90-6.
79. Tanaka M, Tanaka H, Tsukuma H, Ioka A, Oshima A, Nakahara T. Risk factors for intrahepatic cholangiocarcinoma: a possible role of hepatitis B virus. *J Viral Hepat* 2010;17:742-8.
80. Brentnall TA, Haggitt RC, Rabinovitch PS et al. Risk and natural history of colonic neoplasia in patients with primary sclerosing cholangitis and ulcerative colitis. *Gastroenterology* 1996;110:331-8.
81. Graziadei IW, Wiesner RH, Marotta PJ et al. Long-term results of patients undergoing liver transplantation for primary sclerosing cholangitis. *Hepatology* 1999;30:1121-7.
82. Maheshwari A, Yoo HY, Thuluvath PJ. Long-term outcome of liver transplantation in patients with PSC: a comparative analysis with PBC. *Am J Gastroenterol* 2004;99:538-42.
83. Parlak E, Ulker A, Alkim C et al. The course of colonic disease in ulcerative colitis patients with primary sclerosing cholangitis. *Turk J Gastroenterol* 2002;13:134-8.

84. Loftus EV, Jr., Harewood GC, Loftus CG et al. PSC-IBD: a unique form of inflammatory bowel disease associated with primary sclerosing cholangitis. *Gut* 2005;54:91-6.
85. van den Brand FF, van d, V, de Boer YS et al. Increased Mortality Among Patients With vs Without Cirrhosis and Autoimmune Hepatitis. *Clinical Gastroenterology and Hepatology* 2019;17:940-7.
86. Lindstrom L, Lapidus A, Ost A, Bergquist A. Increased risk of colorectal cancer and dysplasia in patients with Crohn's colitis and primary sclerosing cholangitis. *Dis Colon Rectum* 2011;54:1392-7.
87. Sokol H, Cosnes J, Chazouilleres O et al. Disease activity and cancer risk in inflammatory bowel disease associated with primary sclerosing cholangitis. *World J Gastroenterol* 2008;14:3497-503.
88. Claessen MM, Lutgens MW, van Buuren HR et al. More right-sided IBD-associated colorectal cancer in patients with primary sclerosing cholangitis. *Inflamm Bowel Dis* 2009;15:1331-6.
89. Navaneethan U, Choure A, Venkatesh PG et al. Presence of concomitant inflammatory bowel disease is associated with an increased risk of postcholecystectomy complications. *Inflamm Bowel Dis* 2012;18:1682-8.
90. Braden B, Halliday J, Aryasingha S et al. Risk for colorectal neoplasia in patients with colonic Crohn's disease and concomitant primary sclerosing cholangitis. *Clin Gastroenterol Hepatol* 2012;10:303-8.
91. Baars JE, Looman CW, Steyerberg EW et al. The risk of inflammatory bowel disease-related colorectal carcinoma is limited: results from a nationwide nested case-control study. *Am J Gastroenterol* 2011;106:319-28.
92. Hanounh IA, Macaron C, Lopez R, Zein NN, Lashner BA. Risk of colonic neoplasia after liver transplantation for primary sclerosing cholangitis. *Inflamm Bowel Dis* 2012;18:269-74.
93. Vera A, Gunson BK, Ussatoff V et al. Colorectal cancer in patients with inflammatory bowel disease after liver transplantation for primary sclerosing cholangitis. *Transplantation* 2003;75:1983-8.
94. Fraga M, Fournier N, Safroneeva E et al. Primary sclerosing cholangitis in the Swiss Inflammatory Bowel Disease Cohort Study: prevalence, risk factors, and long-term follow-up. *Eur J Gastroenterol Hepatol* 2017;29:91-7.
95. Jess T, Loftus EV, Jr., Velayos FS et al. Risk factors for colorectal neoplasia in inflammatory bowel disease: a nested case-control study from Copenhagen county, Denmark and Olmsted county, Minnesota. *Am J Gastroenterol* 2007;102:829-36.
96. Ananthakrishnan AN, Cagan A, Gainer VS et al. Mortality and extraintestinal cancers in patients with primary sclerosing cholangitis and inflammatory bowel disease. *J Crohns Colitis* 2014;8:956-63.
97. Manninen P, Karvonen AL, Laukkarinen J, Aitola P, Huhtala H, Collin P. Colorectal cancer and cholangiocarcinoma in patients with primary sclerosing cholangitis and inflammatory bowel disease. *Scand J Gastroenterol* 2015;50:423-8.

98. Brandsaeter B, Friman S, Broome U et al. Outcome following liver transplantation for primary sclerosing cholangitis in the Nordic countries. *Scand J Gastroenterol* 2003;38:1176-83.
99. Sint NJ, Tjon AS, Metselaar HJ, Kuipers EJ, de Man RA, van Leerdam ME. Colorectal cancer in post-liver transplant recipients. *Dis Colon Rectum* 2010;53:817-21.
100. Rompianesi G, Ravikumar R, Jose S et al. Incidence and outcome of colorectal cancer in liver transplant recipients: A national, multicentre analysis on 8115 patients. *Liver International* 2019;39:353-60.
101. Fausa O, Kolmannskog F, Ritland S. The pancreatic ducts in primary biliary cirrhosis and sclerosing cholangitis. *Scand J Gastroenterol Suppl* 1985;107:32-5.
102. Shetty K, Rybicki L, Brzezinski A, Carey WD, Lashner BA. The risk for cancer or dysplasia in ulcerative colitis patients with primary sclerosing cholangitis. *Am J Gastroenterol* 1999;94:1643-9.
103. Kornfeld D, Ekbom A, Ihre T. Is there an excess risk for colorectal cancer in patients with ulcerative colitis and concomitant primary sclerosing cholangitis? A population based study. *Gut* 1997;41:522-5.
104. Marchesa P, Lashner BA, Lavery IC et al. The risk of cancer and dysplasia among ulcerative colitis patients with primary sclerosing cholangitis. *Am J Gastroenterol* 1997;92:1285-8.
105. Lakatos L, Mester G, Erdelyi Z et al. Risk factors for ulcerative colitis-associated colorectal cancer in a Hungarian cohort of patients with ulcerative colitis: results of a population-based study. *Inflamm Bowel Dis* 2006;12:205-11.
106. Terg R, Sambuelli A, Coronel E et al. Prevalence of primary sclerosing cholangitis in patients with ulcerative colitis and the risk of developing malignancies. A large prospective study. *Acta Gastroenterol Latinoam* 2008;38:26-33.
107. D'Haens GR, Lashner BA, Hanauer SB. Pericholangitis and sclerosing cholangitis are risk factors for dysplasia and cancer in ulcerative colitis. *Am J Gastroenterol* 1993;88:1174-8.
108. Nuako KW, Ahlquist DA, Sandborn WJ, Mahoney DW, Siems DM, Zinsmeister AR. Primary sclerosing cholangitis and colorectal carcinoma in patients with chronic ulcerative colitis: a case-control study. *Cancer* 1998;82:822-6.
109. Navaneethan U, Kochhar G, Venkatesh PG et al. Duration and severity of primary sclerosing cholangitis is not associated with risk of neoplastic changes in the colon in patients with ulcerative colitis. *Gastrointest Endosc* 2012;75:1045-54.
110. Navaneethan U, Venkatesh PG, Lashner BA, Remzi FH, Shen B, Kiran RP. Temporal trends in colon neoplasms in patients with primary sclerosing cholangitis and ulcerative colitis. *J Crohns Colitis* 2012;6:845-51.
111. Loftus EV, Jr., Aguilar HI, Sandborn WJ et al. Risk of colorectal neoplasia in patients with primary sclerosing cholangitis and ulcerative colitis following orthotopic liver transplantation. *Hepatology* 1998;27:685-90.
112. Navaneethan U, Venkatesh PG, Lashner BA, Shen B, Kiran RP. The impact of ulcerative colitis on the long-term outcome of patients with primary sclerosing cholangitis. *Aliment Pharmacol Ther* 2012;35:1045-53.

113. Marsh JW, Jr., Iwatsuki S, Makowka L et al. Orthotopic liver transplantation for primary sclerosing cholangitis. *Ann Surg* 1988;207:21-5.
114. Schrumpf E, Abdelnoor M, Fausa O, Elgjo K, Jenssen E, Kolmannskog F. Risk factors in primary sclerosing cholangitis. *J Hepatol* 1994;21:1061-6.
115. Van Laethem JL, Deviere J, Bourgeois N et al. Cholangiographic findings in deteriorating primary sclerosing cholangitis. *Endoscopy* 1995;27:223-8.
116. Ahrendt SA, Pitt HA, Kalloo AN et al. Primary sclerosing cholangitis: resect, dilate, or transplant? *Ann Surg* 1998;227:412-23.
117. Kim WR, Therneau TM, Wiesner RH et al. A revised natural history model for primary sclerosing cholangitis. *Mayo Clin Proc* 2000;75:688-94.
118. Boberg KM, Bergquist A, Mitchell S et al. Cholangiocarcinoma in primary sclerosing cholangitis: risk factors and clinical presentation. *Scand J Gastroenterol* 2002;37:1205-11.
119. Goet JC, Floreani A, Verhelst X et al. Validation, clinical utility and limitations of the Amsterdam-Oxford model for primary sclerosing cholangitis. *Journal of Hepatology* 71 (5) (pp 992-999), 2019;71:992-9.
120. Guerra I, Bujanda L, Castro J et al. Clinical Characteristics, Associated Malignancies and Management of Primary Sclerosing Cholangitis in Inflammatory Bowel Disease Patients: A Multicentre Retrospective Cohort Study. *Journal of Crohn's & colitis* 2019;13:1492-500.
121. Bhat M, Mara K, Dierkhising R, Watt KD. Gender, Race and Disease Etiology Predict de Novo Malignancy Risk after Liver Transplantation: Insights for Future Individualized Cancer Screening Guidance. *Transplantation* 2019;103:91-100.
122. Kuo A, Gomel R, Safer R, Lindor KD, Everson GT, Bowlus CL. Characteristics and Outcomes Reported by Patients With Primary Sclerosing Cholangitis Through an Online Registry. *Clinical Gastroenterology and Hepatology* 2019;17:1372-8.
123. Freeman E, Majeed A, Kemp W, Roberts SK. Long-term outcomes of primary sclerosing cholangitis: an Australian non-transplant tertiary hospital perspective. *Internal Medicine Journal* 2019;49:323-7.
124. Aadland E, Schrumpf E, Fausa O et al. Primary sclerosing cholangitis: a long-term follow-up study. *Scand J Gastroenterol* 1987;22:655-64.
125. Saldeen K, Friman S, Olausson M, Olsson R. Follow-up after liver transplantation for primary sclerosing cholangitis: effects on survival, quality of life, and colitis. *Scand J Gastroenterol* 1999;34:535-40.
126. Zenouzi R, Weismuller TJ, Hubener P et al. Low risk of hepatocellular carcinoma in patients with primary sclerosing cholangitis with cirrhosis. *Clin Gastroenterol Hepatol* 2014;12:1733-8.
127. Weismuller TJ, Gulamhusein A, Trivedi P et al. Impact of geographical region on death or transplantation and on malignancy in primary sclerosing cholangitis-a multicenter retrospective study of the international PSC study group (IPSCSG). *Hepatology Conference: 69th Annual Meeting of the American Association for the Study of Liver Diseases, AASLD* 2018;October.

128. van EL, Cunningham M, Narasimman M et al. Risk of gall bladder cancer in patients with primary sclerosing cholangitis and gall bladder polyps: an opportunity to revisit the guidelines. *Journal of Hepatology Conference: The International Liver Congress 2019*;2019.
129. Bambha K, Kim WR, Talwalkar J et al. Incidence, clinical spectrum, and outcomes of primary sclerosing cholangitis in a United States community. *Gastroenterology* 2003;125:1364-9.
130. Farrant JM, Hayllar KM, Wilkinson ML et al. Natural history and prognostic variables in primary sclerosing cholangitis. *Gastroenterology* 1991;100:1710-7.
131. van Erp LW, Cunningham M, Narasimman M et al. Risk of gallbladder cancer in patients with primary sclerosing cholangitis and radiographically detected gallbladder polyps. *Liver International* 2020;40:382-92.
132. Milkiewicz P, Mutimer D, Hubscher SG, Elias E. Autoimmune liver disease in patients with neoplastic diseases. *Eur J Gastroenterol Hepatol* 1999;11:569-73.
133. Mir-Madjlessi SH, Farmer RG, Sivak MV, Jr. Bile duct carcinoma in patients with ulcerative colitis. Relationship to sclerosing cholangitis: report of six cases and review of the literature. *Dig Dis Sci* 1987;32:145-54.
134. Porayko MK, LaRusso NF, Wiesner RH. Primary sclerosing cholangitis: a progressive disease? *Semin Liver Dis* 1991;11:18-25.
135. Rosen CB, Nagorney DM. Cholangiocarcinoma complicating primary sclerosing cholangitis. *Semin Liver Dis* 1991;11:26-30.
136. Rosen CB, Nagorney DM, Wiesner RH, Coffey RJ, Jr., LaRusso NF. Cholangiocarcinoma complicating primary sclerosing cholangitis. *Ann Surg* 1991;213:21-5.
137. Wiesner RH, Porayko MK, Hay JE et al. Liver transplantation for primary sclerosing cholangitis: impact of risk factors on outcome. *Liver Transpl Surg* 1996;2:99-108.
138. Thuluvath PJ, Rai R, Venbrux AC, Yeo CJ. Cholangiocarcinoma: a review. *Gastroenterologist* 1997;5:306-15.
139. Wiesner RH. Liver transplantation for primary biliary cirrhosis and primary sclerosing cholangitis: predicting outcomes with natural history models. *Mayo Clin Proc* 1998;73:575-88.
140. Narayanan Menon KV, Wiesner RH. Etiology and natural history of primary sclerosing cholangitis. *J Hepatobiliary Pancreat Surg* 1999;6:343-51.
141. Chapman RW. Risk factors for biliary tract carcinogenesis. *Ann Oncol* 1999;10 Suppl 4:308-11.
142. Sherlock S. Primary biliary cirrhosis, primary sclerosing cholangitis, and autoimmune cholangitis. *Clin Liver Dis* 2000;4:97-113.
143. Prall RT, Lindor KD, Wiesner RH, LaRusso NF. Current therapies and clinical controversies in the management of primary sclerosing cholangitis. *Curr Gastroenterol Rep* 2000;2:99-103.
144. Stiehl A, Benz C, Sauer P. Primary sclerosing cholangitis. *Can J Gastroenterol* 2000;14:311-5.

145. Tranter SE, Maddern GJ, Berry DP. Inflammatory conditions of the common bile duct. *Aust N Z J Surg* 2000;70:95-7.
146. Talwalkar JA, Lindor KD. Natural history and prognostic models in primary sclerosing cholangitis. *Best Pract Res Clin Gastroenterol* 2001;15:563-75.
147. Ahrendt SA, Nakeeb A, Pitt HA. Cholangiocarcinoma. *Clin Liver Dis* 2001;5:191-218.
148. Jayaram H, Satsangi J, Chapman RW. Increased colorectal neoplasia in chronic ulcerative colitis complicated by primary sclerosing cholangitis: fact or fiction? *Gut* 2001;48:430-4.
149. Lashner BA. Colorectal cancer surveillance for patients with inflammatory bowel disease. *Gastrointest Endosc Clin N Am* 2002;12:135-43, viii.
150. MacFaul GR, Chapman RW. Sclerosing cholangitis. *Curr Opin Gastroenterol* 2004;20:275-80.
151. Shaib Y, El-Serag HB. The epidemiology of cholangiocarcinoma. *Semin Liver Dis* 2004;24:115-25.
152. MacFaul GR, Chapman RW. Sclerosing cholangitis. *Curr Opin Gastroenterol* 2005;21:348-53.
153. Talwalkar JA, Lindor KD. Primary sclerosing cholangitis. *Inflamm Bowel Dis* 2005;11:62-72.
154. Worthington J, Chapman R. Primary sclerosing cholangitis. *Orphanet J Rare Dis* 2006;1:41.
155. LaRusso NF, Shneider BL, Black D et al. Primary sclerosing cholangitis: summary of a workshop. *Hepatology* 2006;44:746-64.
156. MacFaul GR, Chapman RW. Sclerosing cholangitis. *Curr Opin Gastroenterol* 2006;22:288-93.
157. Lazaridis KN, Gores GJ. Primary sclerosing cholangitis and cholangiocarcinoma. *Semin Liver Dis* 2006;26:42-51.
158. Broome U, Bergquist A. Primary sclerosing cholangitis, inflammatory bowel disease, and colon cancer. *Semin Liver Dis* 2006;26:31-41.
159. Levy C, Lindor KD. Primary sclerosing cholangitis: epidemiology, natural history, and prognosis. *Semin Liver Dis* 2006;26:22-30.
160. Ben-Menachem T. Risk factors for cholangiocarcinoma. *Eur J Gastroenterol Hepatol* 2007;19:615-7.
161. Geonzon-Gonzales MR. Primary sclerosing cholangitis. *Gastroenterol Nurs* 2007;30:102-5.
162. Fevery J, Verslype C, Lai G, Aerts R, Van SW. Incidence, diagnosis, and therapy of cholangiocarcinoma in patients with primary sclerosing cholangitis. *Dig Dis Sci* 2007;52:3123-35.
163. Maggs JR, Chapman RW. Sclerosing cholangitis. *Curr Opin Gastroenterol* 2007;23:310-6.
164. Ustundag Y, Bayraktar Y. Cholangiocarcinoma: a compact review of the literature. *World J Gastroenterol* 2008;14:6458-66.

165. Khan SA, Toledano MB, Taylor-Robinson SD. Epidemiology, risk factors, and pathogenesis of cholangiocarcinoma. *HPB (Oxford)* 2008;10:77-82.
166. Silveira MG, Lindor KD. Primary sclerosing cholangitis. *Can J Gastroenterol* 2008;22:689-98.
167. Kitiyakara T, Chapman RW. Chemoprevention and screening in primary sclerosing cholangitis. *Postgrad Med J* 2008;84:228-37.
168. Weismuller TJ, Wedemeyer J, Kubicka S, Strassburg CP, Manns MP. The challenges in primary sclerosing cholangitis--aetiopathogenesis, autoimmunity, management and malignancy. *J Hepatol* 2008;48 Suppl 1:S38-S57.
169. Yachimski P, Pratt DS. Cholangiocarcinoma: natural history, treatment, and strategies for surveillance in high-risk patients. *J Clin Gastroenterol* 2008;42:178-90.
170. Schulick RD. Primary sclerosing cholangitis: detection of cancer in strictures. *J Gastrointest Surg* 2008;12:420-2.
171. Abbas G, Lindor KD. Cholangiocarcinoma in primary sclerosing cholangitis. *J Gastrointest Cancer* 2009;40:19-25.
172. Jesudian AB, Jacobson IM. Screening and diagnosis of cholangiocarcinoma in patients with primary sclerosing cholangitis. *Rev Gastroenterol Disord* 2009;9:E41-E47.
173. Karlsen TH, Schrumpf E, Boberg KM. Primary sclerosing cholangitis. *Best Pract Res Clin Gastroenterol* 2010;24:655-66.
174. Mendes F, Lindor KD. Primary sclerosing cholangitis: overview and update. *Nat Rev Gastroenterol Hepatol* 2010;7:611-9.
175. Krejs GJ. Pancreatic cancer: epidemiology and risk factors. *Dig Dis* 2010;28:355-8.
176. Gatto M, Alvaro D. Cholangiocarcinoma: risk factors and clinical presentation. *Eur Rev Med Pharmacol Sci* 2010;14:363-7.
177. Razumilava N, Gores GJ, Lindor KD. Cancer surveillance in patients with primary sclerosing cholangitis. *Hepatology* 2011;54:1842-52.
178. Torres J, Pineton de CG, Itzkowitz S, Sachar DB, Colombel JF. Review article: colorectal neoplasia in patients with primary sclerosing cholangitis and inflammatory bowel disease. *Aliment Pharmacol Ther* 2011;34:497-508.
179. Tyson GL, El-Serag HB. Risk factors for cholangiocarcinoma. *Hepatology* 2011;54:173-84.
180. Basseri RJ, Basseri B, Papadakis KA. Dysplasia and cancer in inflammatory bowel disease. *Expert Rev Gastroenterol Hepatol* 2011;5:59-66.
181. Andersen V, Halfvarson J, Vogel U. Colorectal cancer in patients with inflammatory bowel disease: can we predict risk? *World J Gastroenterol* 2012;18:4091-4.
182. Dyson JK, Rutter MD. Colorectal cancer in inflammatory bowel disease: what is the real magnitude of the risk? *World J Gastroenterol* 2012;18:3839-48.
183. Rustagi T, Dasanu CA. Risk factors for gallbladder cancer and cholangiocarcinoma: similarities, differences and updates. *J Gastrointest Cancer* 2012;43:137-47.



184. Ehlken H, Schramm C. Primary sclerosing cholangitis and cholangiocarcinoma: pathogenesis and modes of diagnostics. *Dig Dis* 2013;31:118-25.
185. Zein CO. Primary sclerosing cholangitis. *Clin Liver Dis* 2013;17:211-27.
186. Wang R, Leong RW. Primary sclerosing cholangitis as an independent risk factor for colorectal cancer in the context of inflammatory bowel disease: a review of the literature. *World J Gastroenterol* 2014;20:8783-9.
187. Bonato G, Cristoferi L, Strazzabosco M, Fabris L. Malignancies in Primary Sclerosing Cholangitis--A Continuing Threat. *Dig Dis* 2015;33 Suppl 2:140-8.
188. Ehlken H, Schramm C. How Should Cancer Surveillance in Primary Sclerosing Cholangitis Be Performed? *Viszeralmedizin* 2015;31:173-7.
189. Rizvi S, Eaton JE, Gores GJ. Primary Sclerosing Cholangitis as a Premalignant Biliary Tract Disease: Surveillance and Management. *Clin Gastroenterol Hepatol* 2015;13:2152-65.
190. Schrupf E, Boberg KM, Karlsen TH. Primary sclerosing cholangitis - the Norwegian experience. *Scand J Gastroenterol* 2015;50:781-96.
191. Khaderi SA, Sussman NL. Screening for malignancy in primary sclerosing cholangitis (PSC). *Curr Gastroenterol Rep* 2015;17:17.
192. Folseraas T, Boberg KM. Cancer Risk and Surveillance in Primary Sclerosing Cholangitis. *Clin Liver Dis* 2016;20:79-98.
193. Ehlken H, Zenouzi R, Schramm C. Risk of cholangiocarcinoma in patients with primary sclerosing cholangitis: diagnosis and surveillance. *Curr Opin Gastroenterol* 2017;33:78-84.
194. Rao BB, Lashner B, Kowdley KV. Reviewing the Risk of Colorectal Cancer in Inflammatory Bowel Disease after Liver Transplantation for Primary Sclerosing Cholangitis. *Inflammatory Bowel Diseases* 24 (2) (pp 269-276), 2018;18.
195. Fung BM, Tabibian JH. Cholangiocarcinoma in patients with primary sclerosing cholangitis. *Curr Opin Gastroenterol* 2019.
196. Song J, Li Y, Bowlus CL, Yang G, Leung PSC, Gershwin ME. Cholangiocarcinoma in Patients with Primary Sclerosing Cholangitis (PSC): a Comprehensive Review. *Clin Rev Allergy Immunol* 2019.
197. Hamaoka M, Kozaka K, Matsui O et al. Early detection of intrahepatic cholangiocarcinoma. *Jpn J Radiol* 2019;37:669-84.
198. Lleo A, de Boer YS, Liberal R, Colombo M. The risk of liver cancer in autoimmune liver diseases. *Ther Adv Med Oncol* 2019;11:1758835919861914.
199. Chascsa DM, Lindor KD. Cancer risk, screening and surveillance in primary sclerosing cholangitis. *Minerva Gastroenterol Dietol* 2019;65:214-28.
200. Fricker ZP, Lichtenstein DR. Primary Sclerosing Cholangitis: A Concise Review of Diagnosis and Management. *Dig Dis Sci* 2019;64:632-42.
201. Bowlus CL, Lim JK, Lindor KD. AGA Clinical Practice Update on Surveillance for Hepatobiliary Cancers in Patients With Primary Sclerosing Cholangitis: Expert Review. *Clinical Gastroenterology and Hepatology* 2019;17:2416-22.

202. Salazar M, Ituarte C, Abriata MG, Santoro F, Arroyo G. Gallbladder cancer in South America: Epidemiology and prevention. *Chinese Clinical Oncology* 2019;8:32.
203. Kim H-S, El-Serag HB. The Epidemiology of Hepatocellular Carcinoma in the USA. *Current Gastroenterology Reports* 2019;21:17.
204. Thomas T, Cooney R, Iqbal T et al. Colorectal cancer, colectomy rates and inflammatory bowel disease activity following liver transplantation in primary sclerosing cholangitis: A systematic review and meta-analysis. *Journal of Hepatology Conference: The International Liver Congress* 2019;April.
205. Thomas T, Cooney R, Iqbal T et al. Colorectal cancer, colectomy rates and inflammatory bowel disease activity following liver transplantation in primary sclerosing cholangitis: A systematic review and meta-analysis. *Journal of Crohn's and Colitis Conference: 14th Annual Congress of the European Crohn's and Colitis Organisation, ECCO* 2019;March.
206. Khan SA, Tavolari S, Brandi G. Cholangiocarcinoma: Epidemiology and risk factors. *Liver International* 2019;39:19-31.
207. Khan AS, Dageforde LA. Cholangiocarcinoma. *Surgical Clinics of North America* 2019;99:315-35.
208. Fung BM, Lindor KD, Tabibian JH. Cancer risk in primary sclerosing cholangitis: Epidemiology, prevention, and surveillance strategies. *World Journal of Gastroenterology* 2019;25:659-71.
209. Thomas T, Cooney R, Iqbal T et al. Colorectal cancer, colectomy and inflammatory bowel disease activity following liver transplantation in primary sclerosing cholangitis. *Gut Conference: Annual Meeting of the British Society of Gastroenterology, BSG* 2019;June.
210. Sint NJ, de J, V, Steyerberg EW, Kuipers EJ, van Leerdam ME, Veldhuyzen-van Zanten SJ. Risk of colorectal carcinoma in post-liver transplant patients: a systematic review and meta-analysis. *Am J Transplant* 2010;10:868-76.

Supplementary Table 2. Prospective studies of primary sclerosing cholangitis and cholangiocarcinoma

| First author, publication year, country | Study name                                      | Study period                           | Number of participants, number of cases                                                            | Exposure, subgroup               | Comparison               | Relative risk (95% confidence interval) | Adjustment for confounders |
|-----------------------------------------|-------------------------------------------------|----------------------------------------|----------------------------------------------------------------------------------------------------|----------------------------------|--------------------------|-----------------------------------------|----------------------------|
| Burak K et al, 2004, USA                | Mayo Clinic Rochester                           | 1970-1984 - 1997, 11.5 years follow-up | 161 PSC patients, men and women, mean age 40.7 years: 11 cholangiocarcinoma cases                  | PSC                              | Yes vs. no               | 1560 (780-2793)                         | Age, sex                   |
| de Valle MB et al, 2012, Sweden         | Vastra Gotaland                                 | 1992-2005 - 2008, 6.5 years follow-up  | 199 PSC patients, men and women, age 18.2-76.8 years: 17 cholangiocarcinoma cases                  | PSC                              | Yes vs. no               | 868 (505-1390)                          | Age, sex                   |
| Boonstra K et al, 2013, Netherlands     | Groningen, Rotterdam, Leiden                    | 2000-2007 - 2012, 7.7 years follow-up  | 590 PSC patients, men and women, mean age 38.9 years: 44 cholangiocarcinoma cases                  | PSC                              | Yes vs. no               | 398 (246-608)                           | Age, sex                   |
| Barner-Rasmussen N et al, 2020, Finland | Hospital District of Helsinki and Uusimaa (HUS) | 1990-2015, ~25 years follow-up         | 632 PSC patients, mean age 40.6 years: 20 cholangiocarcinoma cases<br>15 cholangiocarcinoma deaths | PSC, incidence<br>PSC, mortality | Yes vs. no<br>Yes vs. no | 235 (143-362)<br>244 (137-402)          | Age, sex, year             |

PSC: primary sclerosing cholangitis

Supplementary Table 3. Prospective studies of primary sclerosing cholangitis and hepatobiliary cancer

| First author, publication year, country | Study name                          | Study period                          | Number of participants, number of cases                                                                           | Exposure, subgroup                                                                                               | Comparison                             | Relative risk (95% confidence interval)                   | Adjustment for confounders |
|-----------------------------------------|-------------------------------------|---------------------------------------|-------------------------------------------------------------------------------------------------------------------|------------------------------------------------------------------------------------------------------------------|----------------------------------------|-----------------------------------------------------------|----------------------------|
| Bergquist A et al, 2002, Sweden         | Swedish Cancer and Death registries | 1970-1998 - 1998, 5.7 years follow-up | 604 PSC patients, men and women, mean age 40.7 years: 53 hepatobiliary cancer cases (31 cases excluding 1st year) | PSC<br>PSC, excluding 1st year of follow-up                                                                      | Yes vs. no<br>Yes vs. no               | 160.6 (120.3-210.1)<br>106.9 (72.6-151.7)                 | Age, sex, calendar-time    |
| de Valle MB et al, 2012, Sweden         | Vastra Gotaland                     | 1992-2005 - 2008, 6.5 years follow-up | 199 PSC patients, men and women, age 18.2-76.8 years: 21 hepatobiliary tract cancer cases                         | PSC<br>PSC, excluding cases diagnosed within 1 year after PSC diagnosis                                          | Yes vs. no<br>Yes vs. no               | 177 (110-271)<br>118 (64.8-199)                           | Age, sex                   |
| Ngu JH et al, 2012, New Zealand         | Canterbury                          | 1980-2008 - 2010, 7 years follow-up   | 81 PSC patients, men and women, age 17-82 years: NA cancer deaths<br>11 hepatobiliary cancer cases                | PSC, hepatobiliary cancer mortality<br>PSC, extrahepatic cancer mortality<br>PSC, hepatobiliary cancer incidence | Yes vs. no<br>Yes vs. no<br>Yes vs. no | 116.9 (66.8-189.8)<br>1.5 (0.3-4.3)<br>105.2 (50.5-193.5) | Age, sex                   |

NA: not available, PSC: primary sclerosing cholangitis

Supplementary Table 4. Prospective studies of primary sclerosing cholangitis and liver cancer

| First author, publication year, country | Study name                                      | Study period                           | Number of participants, number of cases                                                                      | Exposure, subgroup               | Comparison               | Relative risk (95% confidence interval) | Adjustment for confounders |
|-----------------------------------------|-------------------------------------------------|----------------------------------------|--------------------------------------------------------------------------------------------------------------|----------------------------------|--------------------------|-----------------------------------------|----------------------------|
| Card TR et al, 2008, United Kingdom     | UK General Practice Research Database           | 1991-2001 - 2001, ~3.1 years follow-up | 223 PSC patients and 2217 controls, men and women, age 0-≥85 years: 14 liver cancer cases                    | PSC                              | Yes vs. no               | 41.52 (11.43-150.80)                    | Age, sex, smoking status   |
| Barner-Rasmussen N et al, 2020, Finland | Hospital District of Helsinki and Uusimaa (HUS) | 1990-2015, ~25 years follow-up         | 632 PSC patients, mean age 40.6 years: 3 hepatocellular carcinoma cases<br>2 hepatocellular carcinoma deaths | PSC, incidence<br>PSC, mortality | Yes vs. no<br>Yes vs. no | 21.6 (4.45-63.1)<br>22.1 (2.67-79.7)    | Age, sex, year             |

PSC: primary sclerosing cholangitis

Supplementary Table 5. Prospective studies of primary sclerosing cholangitis and gastrointestinal cancer

| First author, publication year, country | Study name                            | Study period                           | Number of participants, number of cases                                                                                                                                                | Exposure, subgroup                                                                  | Comparison | Relative risk (95% confidence interval)                                                       | Adjustment for confounders |
|-----------------------------------------|---------------------------------------|----------------------------------------|----------------------------------------------------------------------------------------------------------------------------------------------------------------------------------------|-------------------------------------------------------------------------------------|------------|-----------------------------------------------------------------------------------------------|----------------------------|
| Bergquist A et al, 2002, Sweden         | Swedish Cancer and Death registries   | 1970-1998 - 1998, 5.7 years follow-up  | 604 PSC patients, men and women, mean age 40.7 years: 71 gastrointestinal cancer cases (esophagus, stomach, small intestine, CRC, hepatobiliary, pancreas)                             | PSC                                                                                 | Yes vs. no | 28.6 (22.4-36.1)                                                                              | Age, sex, calendar-time    |
| Card TR et al, 2008, United Kingdom     | UK General Practice Research Database | 1991-2001 - 2001, ~3.1 years follow-up | 223 PSC patients and 2217 controls, men and women, age 0-≥85 years: 27 gastrointestinal cancer cases (including pancreas, but not further defined)                                     | PSC                                                                                 | Yes vs. no | 2.53 (0.95-6.74)                                                                              | Age, sex, smoking status   |
| de Valle MB et al, 2012, Sweden         | Vastra Gotaland                       | 1992-2005 - 2008, 6.5 years follow-up  | 199 PSC patients, men and women, age 18.2-76.8 years: 24 gastrointestinal cancer cases (liver, bile ducts, gallbladder, abdominal carcinomatosis, CRC)                                 | PSC                                                                                 | Yes vs. no | 19.3 (12.3-28.7)                                                                              | Age, sex                   |
| Søgaard KK et al, 2014, Denmark         | Danish medical registries             | 1994-2010 - 2010, 3.1 years follow-up  | 178 PSC patients, men and women, age <65 and ≥65 years: 15 gastrointestinal cancer cases (esophagus, stomach, small intestine, CRC, anal, liver, gallbladder, biliary tract, pancreas) | PSC<br>PSC, 0-<6 months follow-up<br>PSC, 6-<12<br>PSC, 1-<5 years<br>PSC, ≥5 years | Yes vs. no | 31.5 (17.6-51.9)<br>114 (52.0-216)<br>31.9 (3.86-115)<br>11.0 (2.26-32.1)<br>16.2 (0.41-90.1) | Age, sex, calendar year    |

CRC: colorectal cancer, PSC: primary sclerosing cholangitis

Supplementary Table 6. Prospective studies of primary sclerosing cholangitis and pancreatic cancer

| First author, publication year, country | Study name                                      | Study period                          | Number of participants, number of cases                                                                      | Exposure, subgroup                          | Comparison               | Relative risk (95% confidence interval) | Adjustment for confounders |
|-----------------------------------------|-------------------------------------------------|---------------------------------------|--------------------------------------------------------------------------------------------------------------|---------------------------------------------|--------------------------|-----------------------------------------|----------------------------|
| Bergquist A et al, 2002, Sweden         | Swedish Cancer and Death registries             | 1970-1998 - 1998, 5.7 years follow-up | 604 PSC patients, men and women, mean age 40.7 years: 5 pancreatic cancer cases (3 cases excluding 1st year) | PSC<br>PSC, excluding 1st year of follow-up | Yes vs. no<br>Yes vs. no | 14.3 (4.7-33.4)<br>9.7 (2.0-18.4)       | Age, sex, calendar-time    |
| Liang H et al, 2017, United Kingdom     | UK Clinical Practice Research Datalink (CPRD)   | 1998-2014 - 2014, 5 years follow-up   | 250 PSC patients and 1250 controls, men and women, age 6-93 years: <9 pancreatic cancer cases                | PSC                                         | Yes vs. no               | 2.93 (0.05-56.2)                        | Age, sex                   |
| Barner-Rasmussen N et al, 2020, Finland | Hospital District of Helsinki and Uusimaa (HUS) | 1990-2015, ~25 years follow-up        | 632 PSC patients, mean age 40.6 years: 2 pancreatic cancer cases<br>3 pancreatic cancer deaths               | PSC, incidence<br>PSC, mortality            | Yes vs. no<br>Yes vs. no | 3.06 (0.37-11.0)<br>5.53 (1.14-16.2)    | Age, sex, year             |

PSC: primary sclerosing cholangitis



Supplementary Table 7. Prospective studies of primary sclerosing cholangitis and colorectal cancer

| First author, publication year, country | Study name                                      | Study period                          | Number of participants, number of cases                                                               | Exposure, subgroup                                                               | Comparison                                           | Relative risk (95% confidence interval)                                      | Adjustment for confounders |
|-----------------------------------------|-------------------------------------------------|---------------------------------------|-------------------------------------------------------------------------------------------------------|----------------------------------------------------------------------------------|------------------------------------------------------|------------------------------------------------------------------------------|----------------------------|
| Loftus EV et al, 1996, USA              | Mayo Clinic Minnesota                           | 1984-1988 - 1988, 4.8 years follow-up | 178 PSC patients, men and women, mean age 40.3 years: 4 CRC cases                                     | PSC and UC<br>PSC alone                                                          | Yes vs. no<br>Yes vs. no                             | 10.3 (2.1-30)<br>4.9 (0.1-27)                                                | Age, sex                   |
| Bergquist A et al, 2002, Sweden         | Swedish Cancer and Death registries             | 1970-1998 - 1998, 5.7 years follow-up | 604 PSC patients, men and women, mean age 40.7 years: 12 CRC cases (7 cases excluding 1st year)       | PSC<br>PSC, excluding 1st year of follow-up                                      | Yes vs. no<br>Yes vs. no                             | 10.3 (5.3-18.1)<br>6.8 (2.7-14.0)                                            | Age, sex, calendar-time    |
| de Valle MB et al, 2012, Sweden         | Vastra Gotaland                                 | 1992-2005 - 2008, 6.5 years follow-up | 199 PSC patients, men and women, age 18.2-76.8 years: 2 CRC cases                                     | PSC                                                                              | Yes vs. no                                           | 2.87 (0.33-10.4)                                                             | Age, sex                   |
| Ngu JH et al, 2012, New Zealand         | Canterbury                                      | 1980-2008 - 2010, 7 years follow-up   | 81 PSC patients, men and women, age 17-82 years: 5 CRC cases                                          | PSC                                                                              | Yes vs. no                                           | 7.0 (2.3-16.3)                                                               | Age, sex                   |
| Boonstra K et al, 2013, Netherlands     | Groningen, Rotterdam, Leiden                    | 2000-2007 - 2012, 7.7 years follow-up | 590 PSC patients, men and women, mean age 38.9 years: 20 CRC cases                                    | PSC                                                                              | Yes vs. no                                           | 5.0 (2.02-10.3)                                                              | Age, sex                   |
| Liang H et al, 2017, United Kingdom     | UK Clinical Practice Research Datalink (CPRD)   | 1998-2014 - 2014, 5 years follow-up   | 246 PSC patients and 1244 controls, men and women, age 6-93 years: 20 CRC cases                       | PSC                                                                              | Yes vs. no                                           | 2.5 (0.8-7.0)                                                                | Age, sex                   |
| Barner-Rasmussen N et al, 2020, Finland | Hospital District of Helsinki and Uusimaa (HUS) | 1990-2015, ~25 years follow-up        | 632 PSC patients, mean age 40.6 years: 5 colon cancer cases<br>3 RC cases<br>1 CC death<br>1 RC death | PSC, CC incidence<br>PSC, RC incidence<br>PSC, CC mortality<br>PSC, RC mortality | Yes vs. no<br>Yes vs. no<br>Yes vs. no<br>Yes vs. no | 5.23 (1.70-12.2)<br>5.04 (1.04-14.7)<br>2.78 (0.07-15.5)<br>4.43 (0.11-24.7) | Age, sex, year             |

CC: coloncancer, CRC: colorectal cancer, PSC: primary sclerosing cholangitis, RC: rectal cancer, UC: ulcerative colitis

Supplementary Table 8. Prospective studies of primary sclerosing cholangitis and total cancer

| First author, publication year, country | Study name                                      | Study period                           | Number of participants, number of cases                                               | Exposure, subgroup                     | Comparison               | Relative risk (95% confidence interval) | Adjustment for confounders |
|-----------------------------------------|-------------------------------------------------|----------------------------------------|---------------------------------------------------------------------------------------|----------------------------------------|--------------------------|-----------------------------------------|----------------------------|
| Bergquist A et al, 2002, Sweden         | Swedish Cancer and Death registries             | 1970-1998 - 1998, 5.7 years follow-up  | 604 PSC patients, men and women, mean age 40.7 years: 87 cancer cases                 | PSC                                    | Yes vs. no               | 6.1 (4.9-7.5)                           | Age, sex, calendar-time    |
| Card TR et al, 2008, United Kingdom     | UK General Practice Research Database           | 1991-2001 - 2001, ~3.1 years follow-up | 223 PSC patients and 2217 controls, men and women, age 0->85 years: 128 cancer deaths | PSC                                    | Yes vs. no               | 2.44 (1.53-3.88)                        | Age, sex, smoking status   |
| de Valle MB et al, 2012, Sweden         | Vastra Gotaland                                 | 1992-2005 - 2008, 6.5 years follow-up  | 199 PSC patients, men and women, age 18.2-76.8 years: 29 cancer cases                 | PSC                                    | Yes vs. no               | 4.17 (2.79-5.99)                        | Age, sex                   |
| Ngu JH et al, 2012, New Zealand         | Canterbury                                      | 1980-2008 - 2010, 7 years follow-up    | 81 PSC patients, men and women, age 17-82 years: NA cancer deaths<br>23 cancer cases  | PSC, hepatobiliary cancer mortality    | Yes vs. no               | 116.9 (66.8-189.8)                      | Age, sex                   |
|                                         |                                                 |                                        |                                                                                       | PSC, nonhepatobiliary cancer mortality | Yes vs. no               | 1.5 (0.7-3.0)                           |                            |
|                                         |                                                 |                                        |                                                                                       | PSC, extrahepatic cancer mortality     | Yes vs. no               | 1.5 (0.3-4.3)                           |                            |
|                                         |                                                 |                                        |                                                                                       | PSC, total cancer incidence            | Yes vs. no               | 5.2 (3.3-7.8)                           |                            |
| Barner-Rasmussen N et al, 2020, Finland | Hospital District of Helsinki and Uusimaa (HUS) | 1990-2015, ~25 years follow-up         | 632 PSC patients, mean age 40.6 years: 69 cancer cases<br>38 cancer deaths            | PSC, incidence<br>PSC, mortality       | Yes vs. no<br>Yes vs. no | 3.39 (2.64-4.29)<br>5.92 (4.19-8.12)    | Age, sex, year             |

PSC: primary sclerosing cholangitis

Supplementary Table 9. Prospective studies of primary sclerosing cholangitis and all-cause mortality

| First author, publication year, country | Study name                                      | Study period                           | Number of participants, number of cases                                        | Exposure, subgroup               | Comparison               | Relative risk (95% confidence interval) | Adjustment for confounders |
|-----------------------------------------|-------------------------------------------------|----------------------------------------|--------------------------------------------------------------------------------|----------------------------------|--------------------------|-----------------------------------------|----------------------------|
| Card TR et al, 2008, United Kingdom     | UK General Practice Research Database           | 1991-2001 - 2001, ~3.1 years follow-up | 223 PSC patients and 2217 controls, men and women, age 0-≥85 years: 248 deaths | PSC                              | Yes vs. no               | 2.97 (2.19-4.02)                        | Age, sex, smoking status   |
| de Valle MB et al, 2012, Sweden         | Vastra Gotaland                                 | 1992-2005 - 2008, 6.5 years follow-up  | 199 PSC patients, men and women, age 18.2-76.8 years: 42 deaths                | PSC                              | Yes vs. no               | 4.20 (3.01-5.69)                        | Age, sex                   |
| Ngu JH et al, 2012, New Zealand         | Canterbury                                      | 1980-2008 - 2010, 7 years follow-up    | 81 PSC patients, men and women, age 17-82 years: 22 deaths                     | PSC                              | Yes vs. no               | 4.1 (2.6-6.3)                           | Age, sex                   |
| Boonstra K et al, 2013, Netherlands     | Groningen, Rotterdam, Leiden                    | 2000-2007 - 2012, 7.7 years follow-up  | 590 PSC patients, men and women, mean age 38.9 years: 97 deaths                | PSC                              | Yes vs. no               | 4.2 (3.2-5.4)                           | Age, sex                   |
| Barner-Rasmussen N et al, 2020, Finland | Hospital District of Helsinki and Uusimaa (HUS) | 1990-2015, ~25 years follow-up         | 632 PSC patients, mean age 40.6 years: 69 cancer cases<br>38 cancer deaths     | PSC, incidence<br>PSC, mortality | Yes vs. no<br>Yes vs. no | 3.39 (2.64-4.29)<br>5.92 (4.19-8.12)    | Age, sex, year             |

PSC: primary sclerosing cholangitis

Supplementary Table 10. Prospective studies of primary sclerosing cholangitis and cardiovascular disease

| First author, publication year, country | Study name                 | Study period                        | Number of participants, number of cases                                                                                                                                                                                                                                                                                                                                             | Exposure, subgroup                                                                                                                                                                                                                | Comparison                                                                                                   | Relative risk (95% confidence interval)                                                                                                    | Adjustment for confounders           |
|-----------------------------------------|----------------------------|-------------------------------------|-------------------------------------------------------------------------------------------------------------------------------------------------------------------------------------------------------------------------------------------------------------------------------------------------------------------------------------------------------------------------------------|-----------------------------------------------------------------------------------------------------------------------------------------------------------------------------------------------------------------------------------|--------------------------------------------------------------------------------------------------------------|--------------------------------------------------------------------------------------------------------------------------------------------|--------------------------------------|
| Ngu JH et al, 2012, New Zealand         | Canterbury                 | 1980-2008 - 2010, 7 years follow-up | 81 PSC patients, men and women, age 17-82 years: 22 deaths                                                                                                                                                                                                                                                                                                                          | PSC                                                                                                                                                                                                                               | Yes vs. no                                                                                                   | 0.5 (<0.1-2.9)                                                                                                                             | Age, sex                             |
| Ludvigsson JF et al, 2014, Sweden       | Swedish Medical Registries | 1970-2004, ~46.6 years follow-up    | 678 PSC patients and 6347 controls, men and women, age NA:<br>203/745 CVD cases<br>30/226 hypertensive disease cases<br>17/221 ischemic heart disease cases<br>13/31 pulmonary heart disease cases<br>20/134 cerebrovascular disease cases<br>17/34 cases of diseases of arteries, arterioles, capillaries<br>127/203 cases of diseases of veins, lymphatic vessels and lymph nodes | PSC, CVD<br>PSC, hypertensive disease<br>PSC, IHD<br>PSC, pulmonary heart disease<br>PSC, cerebrovascular disease<br>PSC, diseases of arteries, arterioles, capillaries<br>PSC, diseases of veins, lymphatic vessels, lymph nodes | Yes vs. no<br>Yes vs. no | 3.34 (2.86-3.91)<br>1.56 (1.07-2.28)<br>0.90 (0.55-1.48)<br>5.03 (2.63-9.63)<br>1.74 (1.08-2.78)<br>5.61 (3.13-10.06)<br>6.95 (5.57-10.06) | Age, sex, follow-up duration, county |

NA: not available, PSC: primary sclerosing cholangitis

Supplementary Table 11. Prospective studies of primary sclerosing cholangitis and other cancers

| First author, publication year, country | Study name                                      | Study period                          | Number of participants, number of cases                                                                                                                                           | Exposure, subgroup, outcome                                                                                              | Comparison                                           | Relative risk (95% confidence interval)                                                    | Adjustment for confounders |
|-----------------------------------------|-------------------------------------------------|---------------------------------------|-----------------------------------------------------------------------------------------------------------------------------------------------------------------------------------|--------------------------------------------------------------------------------------------------------------------------|------------------------------------------------------|--------------------------------------------------------------------------------------------|----------------------------|
| Bergquist A et al, 2002, Sweden         | Swedish Cancer and Death registries             | 1970-1998 - 1998, 5.7 years follow-up | 604 PSC patients, men and women, mean age 40.7 years: 1 stomach cancer case                                                                                                       | PSC<br>PSC, excluding 1st year of follow-up                                                                              | Yes vs. no<br>Yes vs. no                             | 2.2 (0.1-12.5)<br>2.5 (0.1-14.1)                                                           | Age, sex, calendar-time    |
| Ngu JH et al, 2012, New Zealand         | Canterbury                                      | 1980-2008 - 2010, 7 years follow-up   | 81 PSC patients, men and women, age 17-82 years: 2 lung cancer cases<br>2 breast cancer cases<br>1 prostate cancer case<br>1 renal cancer case<br>3 nonmelanoma skin cancer cases | PSC, lung cancer<br>PSC, breast cancer<br>PSC, prostate cancer<br>PSC, renal cell cancer<br>PSC, nonmelanoma skin cancer | Yes vs. no<br>Yes vs. no<br>Yes vs. no<br>Yes vs. no | 4.3 (0.5-15.4)<br>4.1 (0.5-14.8)<br>1.2 (<0.1-6.7)<br>0.8 (<0.1-4.6)<br>117.6 (24.2-343.6) | Age, sex                   |
| Barner-Rasmussen N et al, 2020, Finland | Hospital District of Helsinki and Uusimaa (HUS) | 1990-2015, ~25 years follow-up        | 632 PSC patients, mean age 40.6 years: 4 gallbladder cancer cases<br>NA gallbladder cancer deaths                                                                                 | PSC, incidence<br>PSC, mortality                                                                                         | Yes vs. no<br>Yes vs. no                             | 78.3 (21.3-200)<br>45.7 (5.53-165)                                                         | Age, sex, year             |

NA: not available, PSC: primary sclerosing cholangitis

Supplementary Table 12. Study quality of the included studies

| Author, publication year, country       | Representativeness | Selection of non-exposed cohort | Exposure assessment | Demonstration that the outcome was not present at the beginning of the study | Adjusted for one confounder | Adjusted for one additional confounder | Assessment of outcome | Long enough follow-up | Adequacy of follow-up | Total |
|-----------------------------------------|--------------------|---------------------------------|---------------------|------------------------------------------------------------------------------|-----------------------------|----------------------------------------|-----------------------|-----------------------|-----------------------|-------|
| Burak K et al, 2004, USA                | 1                  | 0                               | 1                   | 0                                                                            | 1                           | 1                                      | 1                     | 1                     | 0                     | 6     |
| de Valle MB et al, 2012, Sweden         | 1                  | 0                               | 1                   | 0                                                                            | 1                           | 1                                      | 1                     | 1                     | 0                     | 6     |
| Boonstra K et al, 2013, Netherlands     | 1                  | 0                               | 1                   | 0                                                                            | 1                           | 1                                      | 1                     | 1                     | 1                     | 7     |
| Barner-Rasmussen N et al, 2020, Finland | 1                  | 0                               | 1                   | 1                                                                            | 1                           | 1                                      | 1                     | 1                     | 1                     | 8     |
| Bergquist A et al, 2002, Sweden         | 1                  | 0                               | 1                   | 0                                                                            | 1                           | 1                                      | 1                     | 1                     | 1                     | 7     |
| Ngu JH et al, 2012, New Zealand         | 1                  | 0                               | 1                   | 0                                                                            | 1                           | 1                                      | 0                     | 1                     | 1                     | 6     |
| Card TR et al, 2008, United Kingdom     | 1                  | 1                               | 1                   | 0                                                                            | 1                           | 1                                      | 1                     | 0                     | 0                     | 6     |
| Søgaard KK et al, 2014, Denmark         | 1                  | 0                               | 1                   | 1                                                                            | 1                           | 1                                      | 1                     | 0                     | 0                     | 6     |
| Liang H et al, 2017, United Kingdom     | 1                  | 1                               | 1                   | 1                                                                            | 1                           | 1                                      | 1                     | 1                     | 0                     | 8     |
| Loftus EV et al, 1996, USA              | 1                  | 0                               | 1                   | 0                                                                            | 1                           | 1                                      | 0                     | 0                     | 1                     | 5     |
| Ludvigsson JF et al, 2014, Sweden       | 1                  | 0                               | 1                   | 0                                                                            | 1                           | 1                                      | 1                     | 1                     | 0                     | 6     |

Supplementary Figure 1. Influence analysis for primary sclerosing cholangitis and cholangiocarcinoma

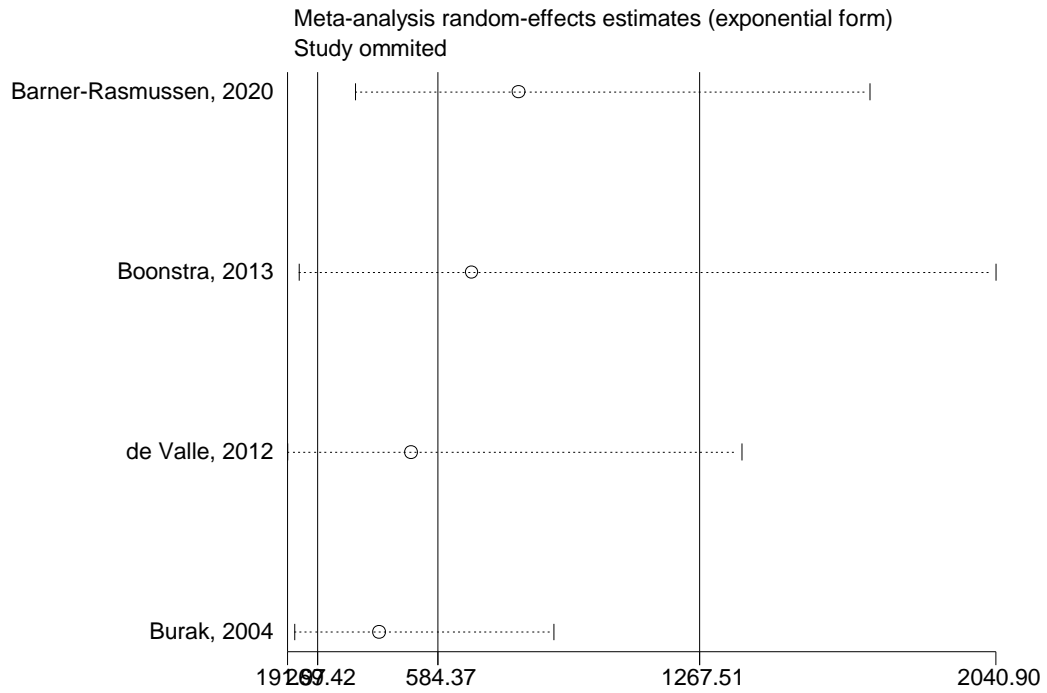

| Study omitted          | e <sup>coef.</sup> | [95% Conf. Interval]  |
|------------------------|--------------------|-----------------------|
| Barner-Rasmussen, 2020 | 793.73743          | 368.17923 - 1711.1752 |
| Boonstra, 2013         | 672.54633          | 221.62656 - 2040.9042 |
| de Valle, 2012         | 514.20544          | 191.96768 - 1377.3528 |
| Burak, 2004            | 430.35608          | 208.91249 - 886.526   |
| Combined               | 584.37179          | 269.41827 - 1267.5101 |

Supplementary Figure 2. Influence analysis for primary sclerosing cholangitis and hepatobiliary cancer

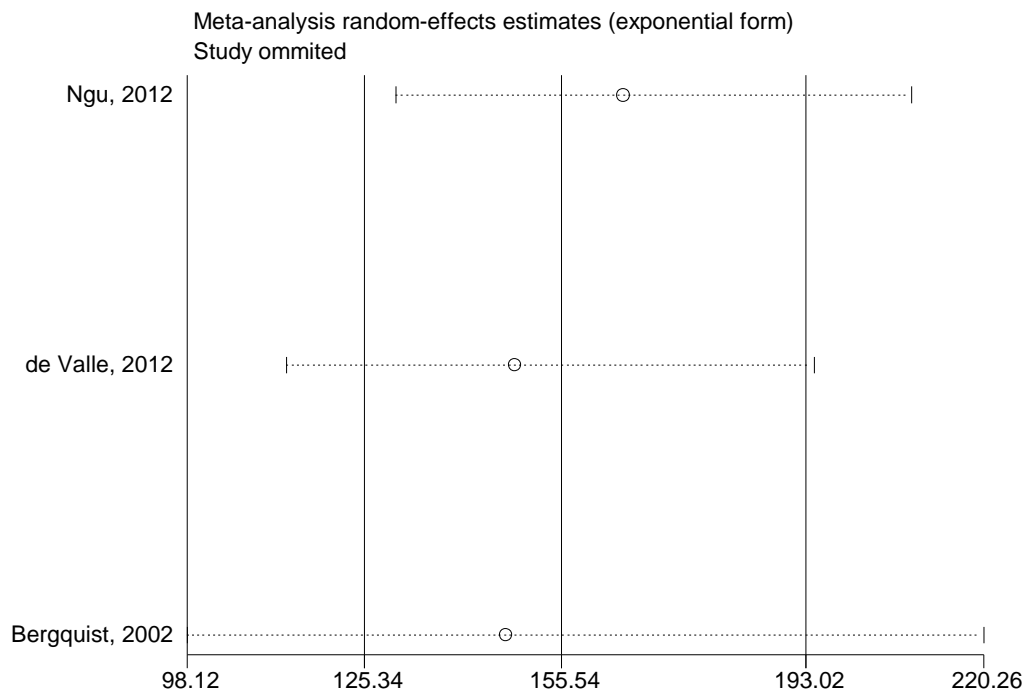

| Study omitted   | e <sup>coef.</sup> | [95% Conf. Interval] |
|-----------------|--------------------|----------------------|
| Ngu, 2012       | 164.97865          | 130.15137 209.12538  |
| de Valle, 2012  | 148.41177          | 113.4073 194.22078   |
| Bergquist, 2002 | 147.01065          | 98.123169 220.25513  |
| Combined        | 155.54197          | 125.33847 193.02378  |



Supplementary Figure 3. Influence analysis for primary sclerosing cholangitis and gastrointestinal cancer

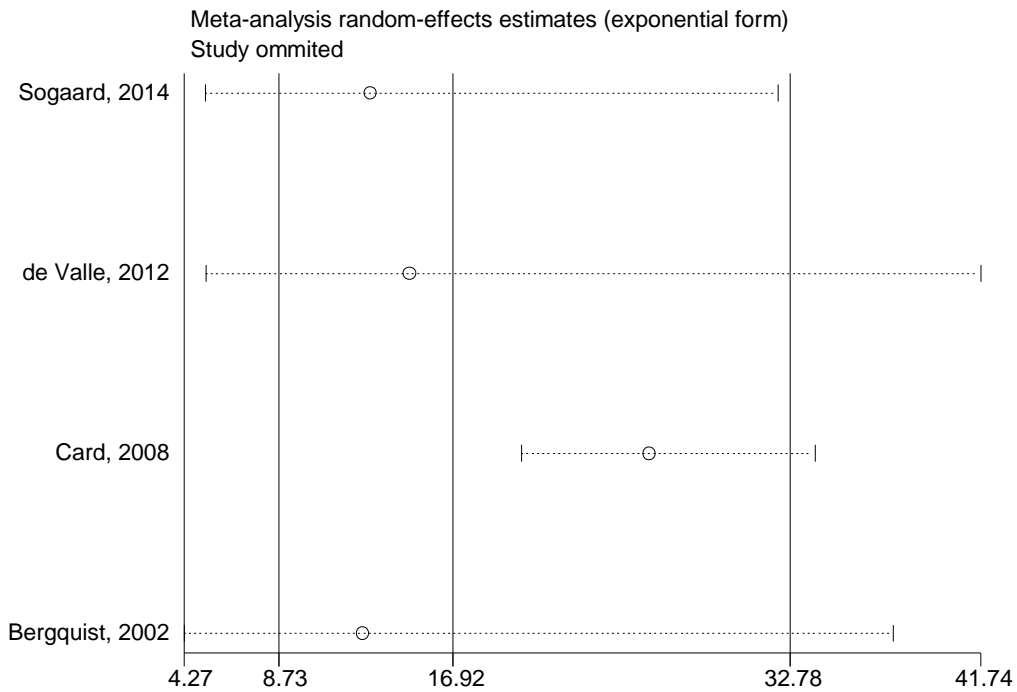

| Study omitted   | e <sup>coef.</sup> | [95% Conf. Interval] |
|-----------------|--------------------|----------------------|
| Sogaard, 2014   | 13.032947          | 5.2757335 32.196033  |
| de Valle, 2012  | 14.880298          | 5.3042088 41.744823  |
| Card, 2008      | 26.153198          | 20.140051 33.961674  |
| Bergquist, 2002 | 12.667599          | 4.2665243 37.610958  |
| Combined        | 16.916358          | 8.7299996 32.779289  |

Supplementary Figure 4. Influence analysis for primary sclerosing cholangitis and pancreatic cancer

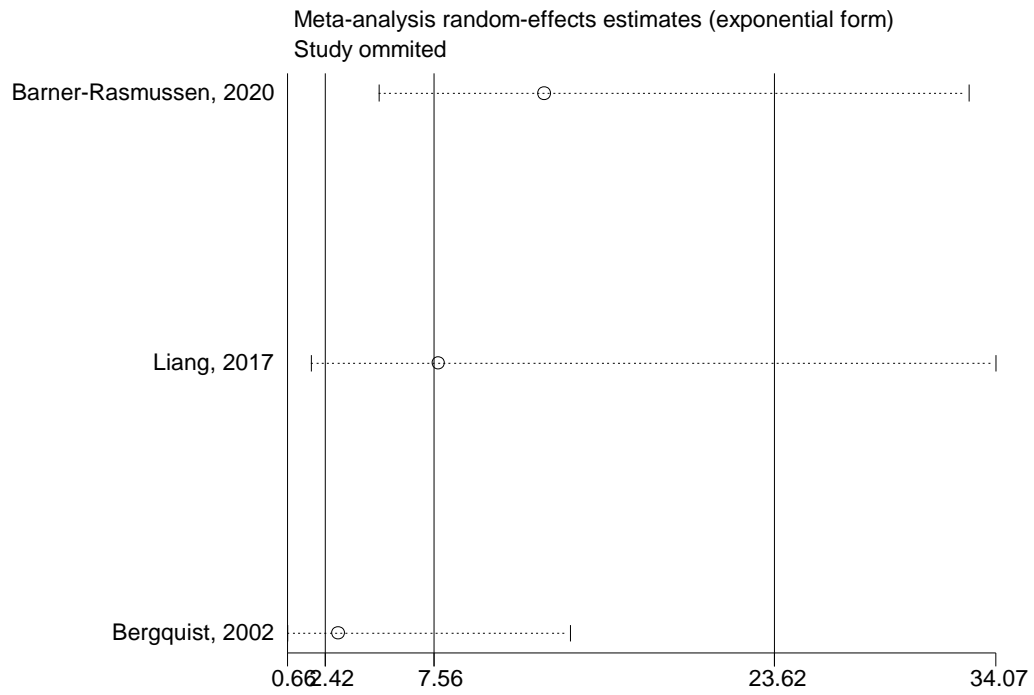

| Study omitted          | e <sup>coef.</sup> | [95% Conf. Interval] |
|------------------------|--------------------|----------------------|
| Barner-Rasmussen, 2020 | 12.751542          | 4.9592934 32.7873    |
| Liang, 2017            | 7.7758412          | 1.7747267 34.069302  |
| Bergquist, 2002        | 3.0349834          | 0.65894431 13.978609 |
| Combined               | 7.5580176          | 2.418183 23.622542   |

Supplementary Figure 5. Influence analysis for primary sclerosing cholangitis and colorectal cancer

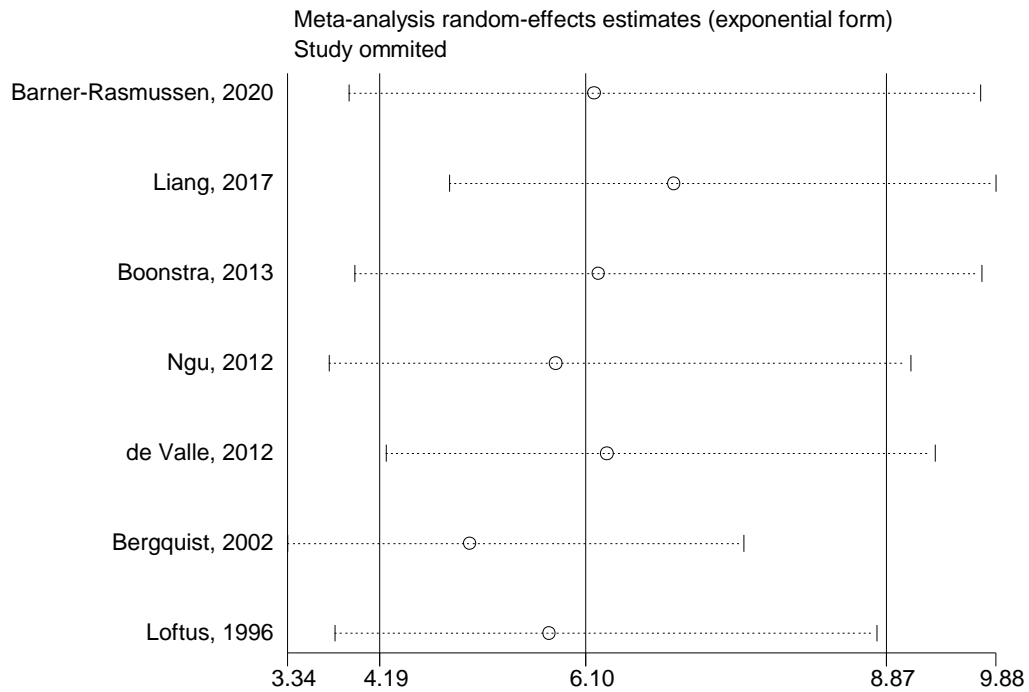

| Study omitted          | $e^{\text{coef.}}$ | [95% Conf. Interval] |           |
|------------------------|--------------------|----------------------|-----------|
| Barner-Rasmussen, 2020 | 6.1707134          | 3.909867             | 9.7388735 |
| Liang, 2017            | 6.91324            | 4.8358364            | 9.8830652 |
| Boonstra, 2013         | 6.2153354          | 3.9611478            | 9.7523232 |
| Ngu, 2012              | 5.8207803          | 3.7252512            | 9.0950861 |
| de Valle, 2012         | 6.2932515          | 4.2502542            | 9.3182707 |
| Bergquist, 2002        | 5.0258203          | 3.3444014            | 7.5525827 |
| Loftus, 1996           | 5.7614946          | 3.7803471            | 8.7808924 |
| Combined               | 6.0976913          | 4.1910404            | 8.8717445 |

Supplementary Figure 6. Influence analysis for primary sclerosing cholangitis and total cancer

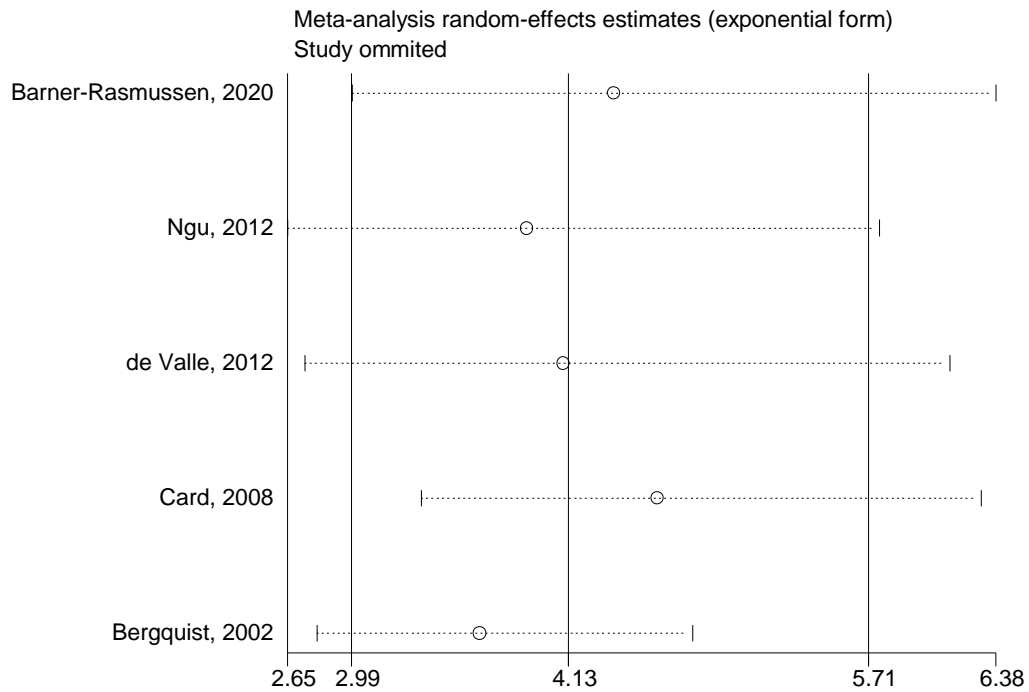

| Study omitted          | e <sup>coef.</sup> | [95% Conf. Interval] |
|------------------------|--------------------|----------------------|
| Barner-Rasmussen, 2020 | 4.3701196          | 2.991837 6.3833504   |
| Ngu, 2012              | 3.9119959          | 2.6528106 5.768867   |
| de Valle, 2012         | 4.1029878          | 2.7417088 6.1401515  |
| Card, 2008             | 4.5998974          | 3.3559885 6.3048658  |
| Bergquist, 2002        | 3.6640389          | 2.8061283 4.7842364  |
| Combined               | 4.1308989          | 2.987148 5.7125812   |

Supplementary Figure 7. Influence analysis for primary sclerosing cholangitis and all-cause mortality

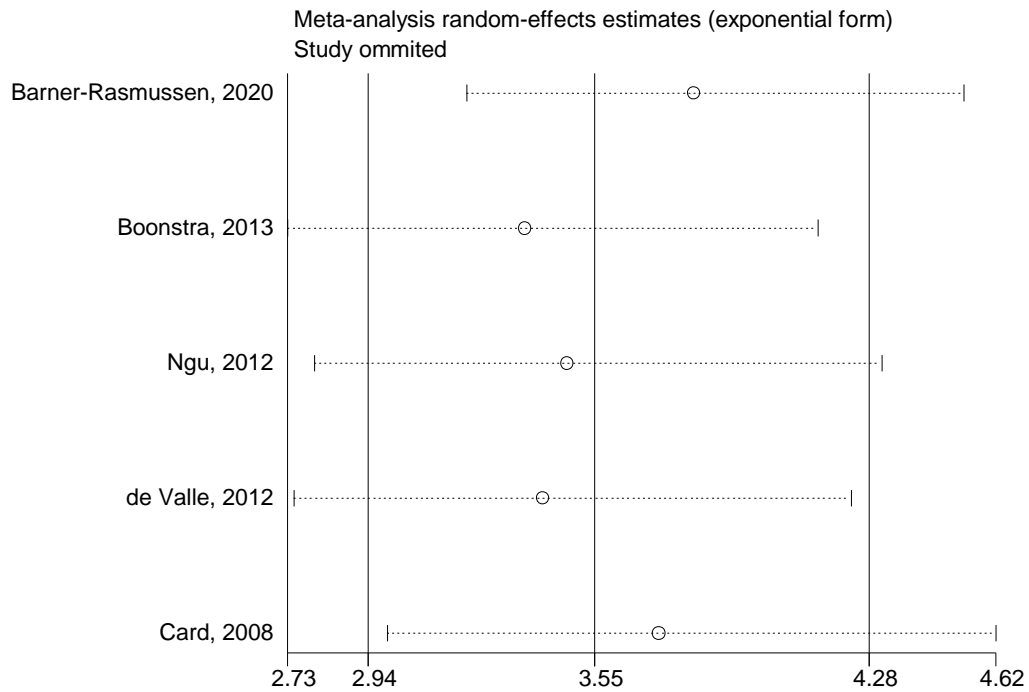

| Study omitted          | $e^{\text{coef.}}$ | [95% Conf. Interval] |           |
|------------------------|--------------------|----------------------|-----------|
| Barner-Rasmussen, 2020 | 3.8129308          | 3.2046387            | 4.5366864 |
| Boonstra, 2013         | 3.361927           | 2.7258489            | 4.1464348 |
| Ngu, 2012              | 3.4747977          | 2.7963603            | 4.3178344 |
| de Valle, 2012         | 3.4087121          | 2.7431645            | 4.2357354 |
| Card, 2008             | 3.7189538          | 2.9919324            | 4.6226373 |
| Combined               | 3.5487863          | 2.9409168            | 4.2822987 |
